# Supplementary material for: Mckelveyite group minerals – Part 2: Alicewilsonite-(YCe), Na2Sr2YCe(CO3)6 ⋅ 3H2O, a new species
Source: Copernicus journal article supplement (doi:10.5194/ejm-35-143-2023), 2023-02-28
Supplement: Supplementary file [file ejm-35-143-2023-supplement-title-page.pdf › ejm-35-143-2023-supplement-title-page.pdf]

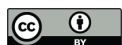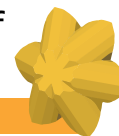

*Supplement of*

**Mckelveyite group minerals – Part 2: Alicewilsonite-(YCe),  $\text{Na}_2\text{Sr}_2\text{YCe}(\text{CO}_3)_6 \cdot 3\text{H}_2\text{O}$ , a new species**

**Inna Lykova et al.**

*Correspondence to:* Inna Lykova (ilykova@nature.ca)

- ejm-35-143-2023-supplement-title-page.pdf
- Supplement
  - alicewilsonite-(YCe).cif
  - alicewilsonite-(YCe)\_PXR\_pattern\_K-alpha-1\_0.xy

The copyright of individual parts of the supplement might differ from the article licence.
